# Supplementary material for: The interaction between permethrin exposure and malaria infection affects the host-seeking behaviour of mosquitoes
Source: Malar J. 2019 Mar 14;18:79. doi: 10.1186/s12936-019-2718-x (PMC6416862; doi:10.1186/s12936-019-2718-x)
Supplement: Supplementary file 1 — Additional file 1: Table S1. Dataset Irritancy. Data used for statistical analysis of irritancy. Table S2. Dataset Motivation to bite. Data used for statistical analysis of the motivation of mosquitoes to bite after permethrin exposure (interval count analysis). [file 12936_2019_2718_MOESM1_ESM.xlsx]

## Sheet: Dataset_Irritancy
The interaction between permethrin exposure and malaria infection affects the host-seeking behavior of mosquitoes.
Kevin Thiévent, Gaël Hauser, Obada Elaian and Jacob C. Koella
ID	Status	Mouse	TimetoJump	Jump	Wings	Censor	JumpFreq	Age
1	Co	C2	29	5	0.327	1	0.0549451	21
2	Co	C2	11	10	0.355	1	0.0917431	21
3	Co	C3	19	13	0.349	1	0.128713	21
4	Co	C1	8	11	0.347	1	0.0982143	21
5	Co	C3	3	8	0.309	1	0.0683761	21
6	Co	C3	41	9	0.307	1	0.113924	21
7	Co	C3	6	7	0.323	1	0.0614035	21
8	Co	C3	34	2	0.297	1	0.0232558	21
9	Co	C3	16	4	0.343	1	0.0384615	21
10	Co	C1	14	5	0.3	1	0.0471698	21
11	Co	C2	8	9	0.315	1	0.0803571	21
12	Co	C2	15	15	0.332	1	0.142857	21
13	Co	C1	20	12	0.339	1	0.12	21
14	Co	C1	17	6	0.346	1	0.0582524	21
15	Co	C1	24	4	0.323	1	0.0416667	21
16	Co	C1	45	18	0.322	1	0.24	21
17	Co	C1	8	6	0.347	1	0.0535714	21
18	Co	C2	13	8	0.348	1	0.0747664	21
19	Co	C1	8	7	0.305	1	0.0625	21
20	Co	C2	23	9	0.348	1	0.0927835	21
21	Co	C2	27	8	0.335	1	0.0860215	21
22	Co	C1	15	12	0.319	1	0.114286	21
23	Co	C1	120	0	0.343	0		21
24	Co	C2	41	8	0.317	1	0.101266	21
25	Co	C3	30	2	0.298	1	0.0222222	21
26	Co	C3	16	5	0.326	1	0.0480769	21
27	Co	C3	34	8	0.331	1	0.0930233	21
28	Co	C1	17	27	0.308	1	0.262136	21
29	Co	C2	41	2	0.324	1	0.0253165	21
30	Co	C3	8	11	0.32	1	0.0982143	21
31	Co	C3	5	15	0.316	1	0.130435	21
32	Co	C1	19	8	0.338	1	0.0792079	21
33	Co	C1	23	6	0.329	1	0.0618557	21
34	Co	C2	29	6	0.343	1	0.0659341	21
35	Co	C3	62	1	0.356	1	0.0172414	21
36	Co	C3	120	0	0.309	0		21
37	Co	C1	40	3	0.331	1	0.0375	21
38	Co	C3	16	6	0.311	1	0.0576923	21
39	Co	C2	29	1	0.368	1	0.010989	21
40	Co	C3	22	13	0.314	1	0.132653	21
41	Co	C1	17	15	0.298	1	0.145631	21
42	Co	C3	27	4	0.302	1	0.0430108	21
43	Co	C3	21	6	0.307	1	0.0606061	21
44	Co	C3	39	2	0.326	1	0.0246914	21
45	Co	C2	34	8	0.367	1	0.0930233	21
46	Co	C1	27	3	0.345	1	0.0322581	21
47	Co	C3	7	8	0.317	1	0.0707965	21
48	Co	C1	36	2	0.359	1	0.0238095	21
49	Co	C2	120	0	0.323	0		21
50	Co	C3	13	7	0.299	1	0.0654206	21
51	Co	C3	25	11	0.304	1	0.115789	21
52	Co	C3	23	8	0.323	1	0.0824742	21
53	Co	C1	29	13	0.318	1	0.142857	21
54	Co	C1	16	7	0.333	1	0.0673077	21
55	Co	C3	13	18	0.341	1	0.168224	21
56	Co	C2	22	10	0.308	1	0.102041	21
57	Co	C2	30	1	0.324	1	0.0111111	21
58	Co	C2	8	8	0.355	1	0.0714286	21
59	Co	C2	25	7	0.297	1	0.0736842	21
60	Co	C2	53	3	0.327	1	0.0447761	21
61	Co	C2	33	5	0.343	1	0.0574713	21
62	Co	C2	20	11	0.312	1	0.11	21
63	Co	C2	16	6	0.34	1	0.0576923	21
64	Co	C2	40	7	0.326	1	0.0875	21
65	Inf	I3	33	2	0.31	1	0.0229885	21
66	Inf	I3	24	7	0.336	1	0.0729167	21
67	Inf	I1	6	12	0.318	1	0.105263	21
68	Inf	I2	37	11	0.321	1	0.13253	21
69	Inf	I1	19	14	0.339	1	0.138614	21
70	Inf	I2	27	4	0.333	1	0.0430108	21
71	Inf	I2	14	3	0.336	1	0.0283019	21
72	Inf	I3	43	6	0.358	1	0.0779221	21
73	Inf	I1	36	3	0.319	1	0.0357143	21
74	Inf	I3	18	8	0.346	1	0.0784314	21
75	Inf	I1	24	11	0.331	1	0.114583	21
76	Inf	I1	43	18	0.321	1	0.233766	21
77	Inf	I2	13	15	0.352	1	0.140187	21
78	Inf	I2	26	6	0.326	1	0.0638298	21
79	Inf	I1	16	4	0.301	1	0.0384615	21
80	Inf	I3	14	7	0.332	1	0.0660377	21
81	Inf	I1	43	5	0.242	1	0.0649351	21
82	Inf	I3	27	8	0.302	1	0.0860215	21
83	Inf	I3	21	11	0.307	1	0.111111	21
84	Inf	I3	41	6	0.342	1	0.0759494	21
85	Inf	I3	12	7	0.325	1	0.0648148	21
86	Inf	I3	16	3	0.258	1	0.0288462	21
87	Inf	I3	27	9	0.336	1	0.0967742	21
88	Inf	I1	8	13	0.337	1	0.116071	21
89	Inf	I2	62	3	0.348	1	0.0517241	21
90	Inf	I1	7	6	0.325	1	0.0530973	21
91	Inf	I1	45	7	0.325	1	0.0933333	21
92	Inf	I3	17	15	0.348	1	0.145631	21
93	Inf	I2	65	4	0.335	1	0.0727273	21
94	Inf	I2	24	4	0.24	1	0.0416667	21
95	Inf	I3	14	14	0.364	1	0.132075	21
96	Inf	I2	18	6	0.308	1	0.0588235	21
97	Inf	I3	20	7	0.329	1	0.07	21
98	Inf	I2	120	0	0.347	0		21
99	Inf	I3	17	3	0.333	1	0.0291262	21
100	Inf	I2	18	9	0.363	1	0.0882353	21
101	Inf	I2	32	3	0.314	1	0.0340909	21
102	Inf	I2	39	11	0.329	1	0.135802	21
103	Inf	I3	120	0	0.356	0		21
104	Inf	I1	36	2	0.336	1	0.0238095	21
105	Inf	I1	29	4	0.284	1	0.043956	21
106	Inf	I2	11	9	0.335	1	0.0825688	21
107	Inf	I3	8	7	0.307	1	0.0625	21
108	Inf	I1	50	2	0.312	1	0.0285714	21
109	Inf	I3	73	4	0.344	1	0.0851064	21
110	Inf	I2	39	7	0.348	1	0.0864198	21
111	Inf	I2	26	2	0.293	1	0.0212766	21
112	Inf	I1	29	3	0.327	1	0.032967	21
113	Inf	I1	30	4	0.319	1	0.0444444	21
114	Inf	I3	19	8	0.331	1	0.0792079	21
115	Inf	I3	23	10	0.308	1	0.103093	21
116	Inf	I3	24	7	0.319	1	0.0729167	21
117	Inf	I3	24	2	0.315	1	0.0208333	21
118	Inf	I3	54	3	0.317	1	0.0454545	21
119	Inf	I3	18	6	0.301	1	0.0588235	21
120	Co	C1	18	7	0.389	1	0.0686275	11
121	Co	C1	14	6	0.319	1	0.0566038	11
122	Co	C1	12	10	0.293	1	0.0925926	11
123	Co	C1	10	3	0.338	1	0.0272727	11
124	Co	C1	19	6	0.322	1	0.0594059	11
125	Co	C1	14	17	0.334	1	0.160377	11
126	Co	C1	36	6	0.315	1	0.0714286	11
127	Co	C1	25		0.281	1		11
128	Co	C1	14	5	0.324	1	0.0471698	11
129	Co	C1	16	9	0.322	1	0.0865385	11
130	Co	C1	7	16	0.306	1	0.141593	11
131	Co	C1	13	9	0.357	1	0.0841121	11
132	Co	C1	28	9	0.312	1	0.0978261	11
133	Co	C2	12	10	0.336	1	0.0925926	11
134	Co	C2	18	5	0.297	1	0.0490196	11
135	Co	C2	9	21	0.321	1	0.189189	11
136	Co	C2	10	12	0.326	1	0.109091	11
137	Co	C2	6	14	0.316	1	0.122807	11
138	Co	C2	11	7	0.342	1	0.0642202	11
139	Co	C2	32	3	0.302	1	0.0340909	11
140	Co	C2	21	5	0.309	1	0.0505051	11
141	Co	C2	40	3	0.337	1	0.0375	11
142	Co	C2	120	0	0.323	0		11
143	Co	C2	30	2	0.335	1	0.0222222	11
144	Co	C2	6	15	0.315	1	0.131579	11
145	Co	C2	82	2	0.355	1	0.0526316	11
146	Co	C3	17	9	0.333	1	0.0873786	11
147	Co	C3	8	9	0.361	1	0.0803571	11
148	Co	C3	120	0	0.321	0		11
149	Co	C3	28	9	0.325	1	0.0978261	11
150	Co	C3	17	5	0.343	1	0.0485437	11
151	Co	C3	19	12	0.328	1	0.118812	11
152	Co	C3	67	5	0.321	1	0.0943396	11
153	Co	C3	8	11	0.35	1	0.0982143	11
154	Co	C3	18	8	0.35	1	0.0784314	11
155	Co	C3	12	6	0.324	1	0.0555556	11
156	Co	C3	25	4	0.329	1	0.0421053	11
157	Co	C3	17	17	0.318	1	0.165049	11
158	Co	C3	14	10	0.332	1	0.0943396	11
159	Inf	I1	15	6	0.347	1	0.0571429	11
160	Inf	I1	16	12	0.322	1	0.115385	11
161	Inf	I1	13	14	0.322	1	0.130841	11
162	Inf	I1	36	8	0.319	1	0.0952381	11
163	Inf	I1	17	4	0.343	1	0.038835	11
164	Inf	I1	6	7	0.317	1	0.0614035	11
165	Inf	I1	31	4	0.312	1	0.0449438	11
166	Inf	I2	26	9	0.342	1	0.0957447	11
167	Inf	I2	27	8	0.322	1	0.0860215	11
168	Inf	I2	19	2	0.335	1	0.019802	11
169	Inf	I2	10	4	0.328	1	0.0363636	11
170	Inf	I2	17	9	0.362	1	0.0873786	11
171	Inf	I2	5	19	0.318	1	0.165217	11
172	Inf	I2	16	6	0.357	1	0.0576923	11
173	Inf	I2	49	2	0.302	1	0.028169	11
174	Inf	I2	43	5	0.33	1	0.0649351	11
175	Inf	I2	22	4	0.348	1	0.0408163	11
176	Inf	I3	22	1	0.342	1	0.0102041	11
177	Inf	I3	43	4	0.334	1	0.0519481	11
178	Inf	I3	26	12	0.32	1	0.12766	11
179	Inf	I3	39	4	0.348	1	0.0493827	11
180	Inf	I3	37		0.318	1		11
181	Inf	I3	55	9	0.338	1	0.138462	11
182	Inf	I3	41	3	0.329	1	0.0379747	11
183	Inf	I3	38	7	0.354	1	0.0853659	11
184	Inf	I3	16	14	0.313	1	0.134615	11

## Sheet: Dataset_Motivation_to_bite
The interaction between permethrin exposure and malaria infection affects the host-seeking behavior of mosquitoes.
Kevin Thiévent, Gaël Hauser, Obada Elaian and Jacob C. Koella
Interval	Total	Pique	Expo	Status	LgdeltaT	Age
2	25	15	Oil	Co	0.693147	11
2	34	19	Oil	Co	0.693147	21
2	26	0	Perm1	Co	0.693147	11
2	38	1	Perm1	Co	0.693147	21
2	29	0	Perm2	Co	0.693147	11
2	35	1	Perm2	Co	0.693147	21
2	19	12	Oil	Inf	0.693147	11
2	27	18	Oil	Inf	0.693147	21
2	19	0	Perm1	Inf	0.693147	11
2	27	2	Perm1	Inf	0.693147	21
2	24	1	Perm2	Inf	0.693147	11
2	26	0	Perm2	Inf	0.693147	21
9	10	7	Oil	Co	1.94591	11
9	15	4	Oil	Co	1.94591	21
9	26	3	Perm1	Co	1.94591	11
9	37	3	Perm1	Co	1.94591	21
9	29	3	Perm2	Co	1.94591	11
9	34	1	Perm2	Co	1.94591	21
9	7	7	Oil	Inf	1.94591	11
9	9	5	Oil	Inf	1.94591	21
9	19	5	Perm1	Inf	1.94591	11
9	25	5	Perm1	Inf	1.94591	21
9	23	7	Perm2	Inf	1.94591	11
9	26	3	Perm2	Inf	1.94591	21
24	3	0	Oil	Co	2.70805	11
24	11	2	Oil	Co	2.70805	21
24	23	6	Perm1	Co	2.70805	11
24	34	14	Perm1	Co	2.70805	21
24	26	10	Perm2	Co	2.70805	11
24	33	8	Perm2	Co	2.70805	21
24	0	0	Oil	Inf	2.70805	11
24	4	2	Oil	Inf	2.70805	21
24	14	9	Perm1	Inf	2.70805	11
24	20	12	Perm1	Inf	2.70805	21
24	16	9	Perm2	Inf	2.70805	11
24	23	12	Perm2	Inf	2.70805	21
30	3	2	Oil	Co	1.79176	11
30	9	1	Oil	Co	1.79176	21
30	17	6	Perm1	Co	1.79176	11
30	20	7	Perm1	Co	1.79176	21
30	16	6	Perm2	Co	1.79176	11
30	25	4	Perm2	Co	1.79176	21
30	0	0	Oil	Inf	1.79176	11
30	2	1	Oil	Inf	1.79176	21
30	5	3	Perm1	Inf	1.79176	11
30	8	3	Perm1	Inf	1.79176	21
30	7	4	Perm2	Inf	1.79176	11
30	11	0	Perm2	Inf	1.79176	21
36	1	0	Oil	Co	1.79176	11
36	8	2	Oil	Co	1.79176	21
36	11	3	Perm1	Co	1.79176	11
36	13	6	Perm1	Co	1.79176	21
36	10	4	Perm2	Co	1.79176	11
36	21	4	Perm2	Co	1.79176	21
36	0	0	Oil	Inf	1.79176	11
36	1	0	Oil	Inf	1.79176	21
36	2	1	Perm1	Inf	1.79176	11
36	5	0	Perm1	Inf	1.79176	21
36	3	1	Perm2	Inf	1.79176	11
36	11	2	Perm2	Inf	1.79176	21
48	1	0	Oil	Co	2.48491	11
48	6	2	Oil	Co	2.48491	21
48	8	3	Perm1	Co	2.48491	11
48	7	2	Perm1	Co	2.48491	21
48	6	4	Perm2	Co	2.48491	11
48	17	4	Perm2	Co	2.48491	21
48	0	0	Oil	Inf	2.48491	11
48	1	0	Oil	Inf	2.48491	21
48	1	1	Perm1	Inf	2.48491	11
48	5	3	Perm1	Inf	2.48491	21
48	2	0	Perm2	Inf	2.48491	11
48	9	3	Perm2	Inf	2.48491	21
